# Supplementary material for: CYP2D6 Genotype and Tamoxifen Response for Breast Cancer: A Systematic Review and Meta-Analysis
Source: PLOS journal article supplement (doi:10.1371/journal.pone.0076648), 2013-10-02
Supplement: S10 (10.1371/journal.pone.0076648.s010) [file journal.pone.0076648.s010]

**Figure S2: Generation of the composite outcomes from outcomes reported in the studies identified from the systematic review.**

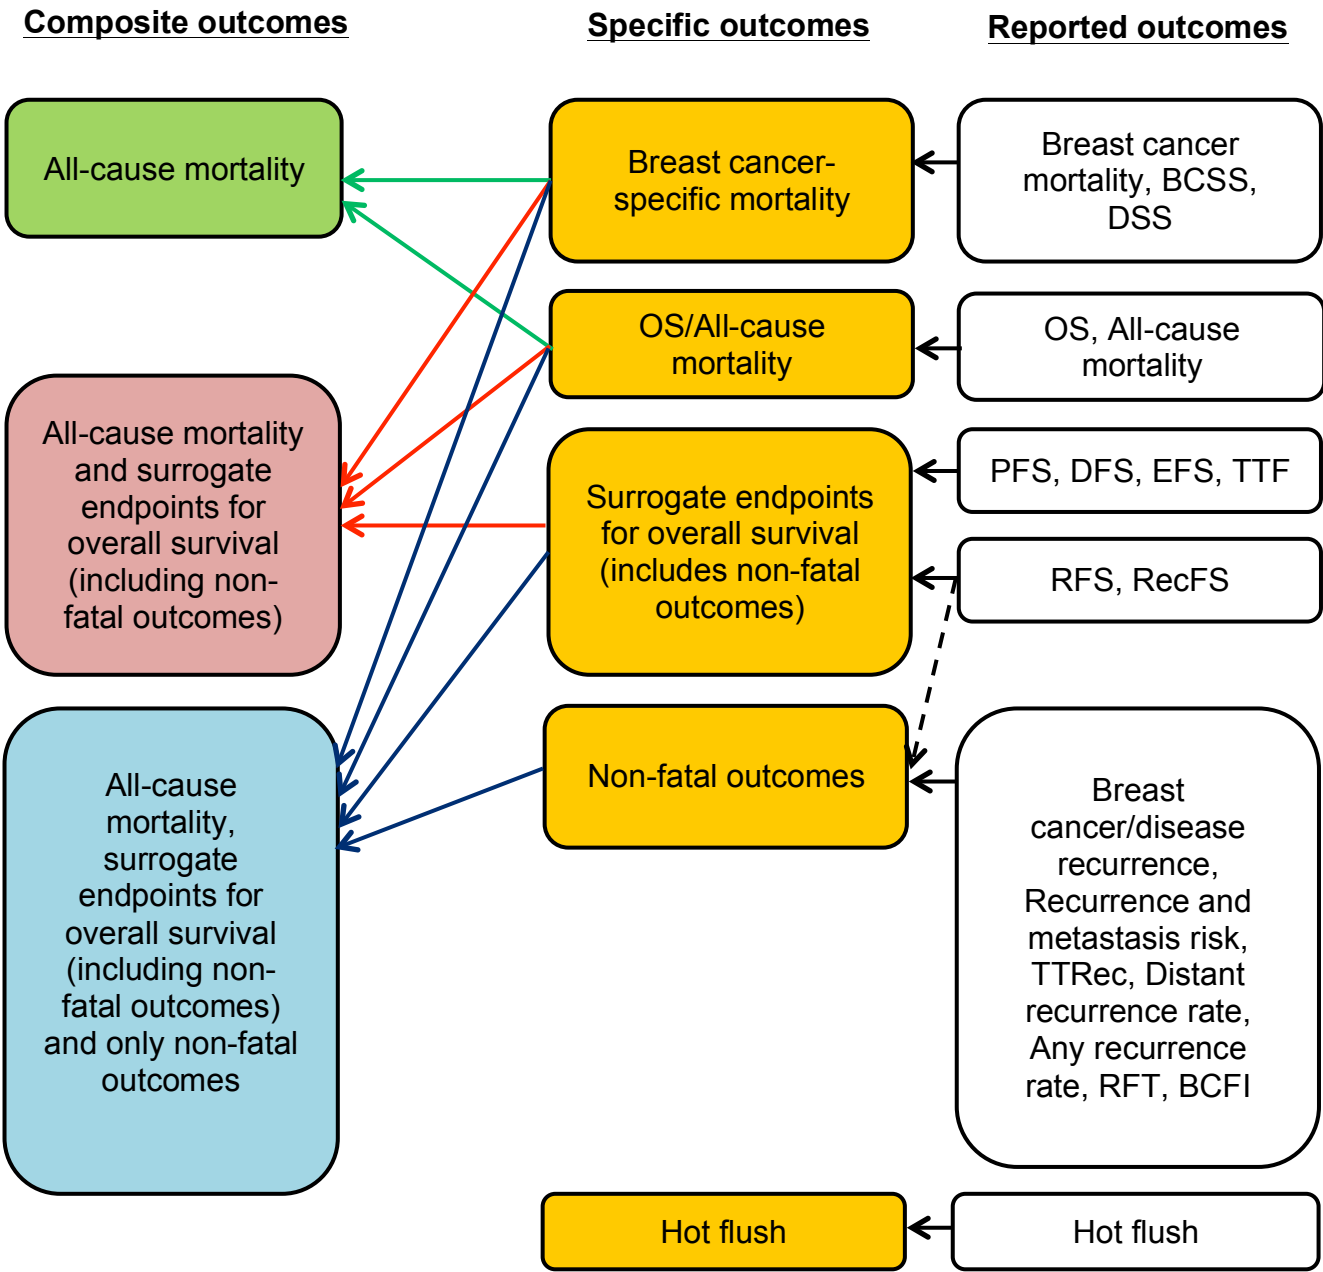

**Footnotes:** BCFI: breast cancer-free interval, BCSS: breast cancer-specific survival, DFS: disease-free survival, DSS: disease-specific survival, EFS: event-free survival, OS: overall survival, PFS: progression-free survival, RFS: relapse-free survival, RFT: relapse-free time RecFS: recurrence-free survival, TTF: time to-treatment failure, TTRec: time to recurrence. Dash arrow: reported outcomes included only for specific outcome meta-analysis.
